# Supplementary material
Source: ML conference proceedings conference paper supplement (https://openreview.net/forum?id=dPuAYNTNQ4)

—+— GPT3.5 Accuracy    —●— Llama2-13B Accuracy    —★— Llama2-7B Accuracy

SQA Step of Summarization

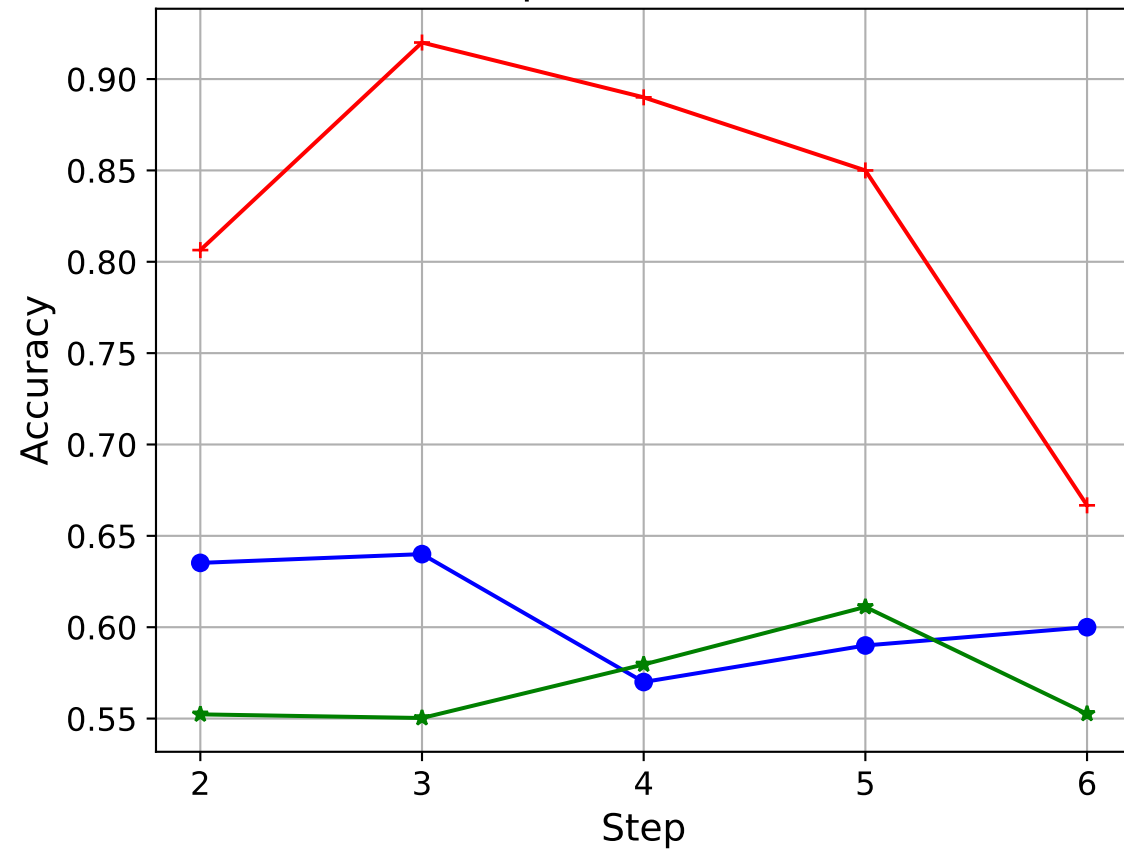

GSM8K Step of Summarization

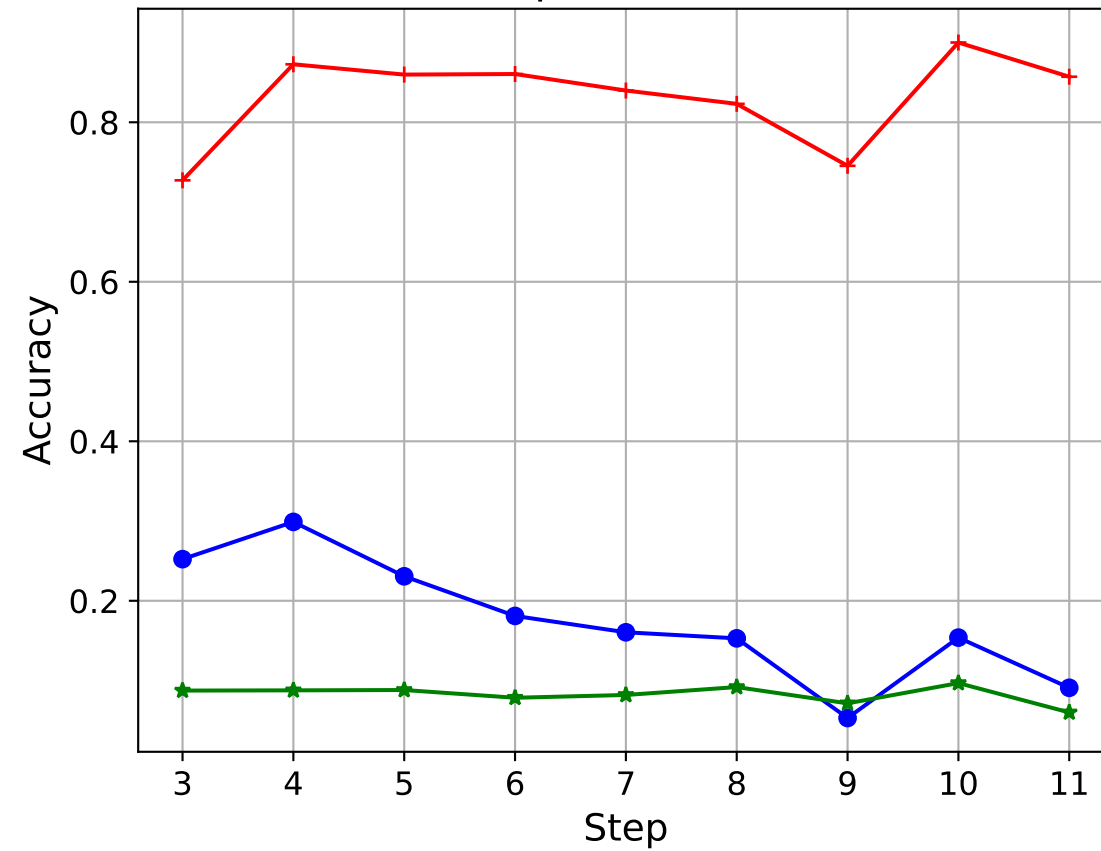

CSQA Step of Summarization

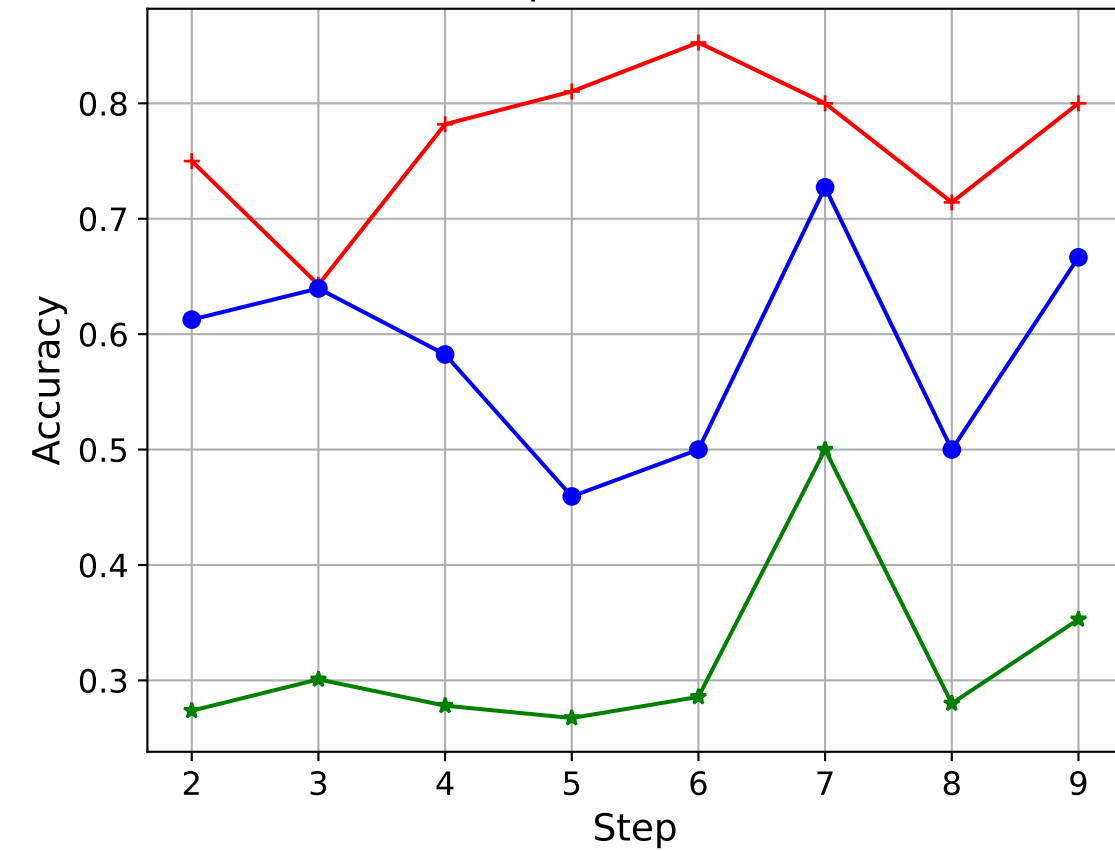

AddSub Step of Summarization

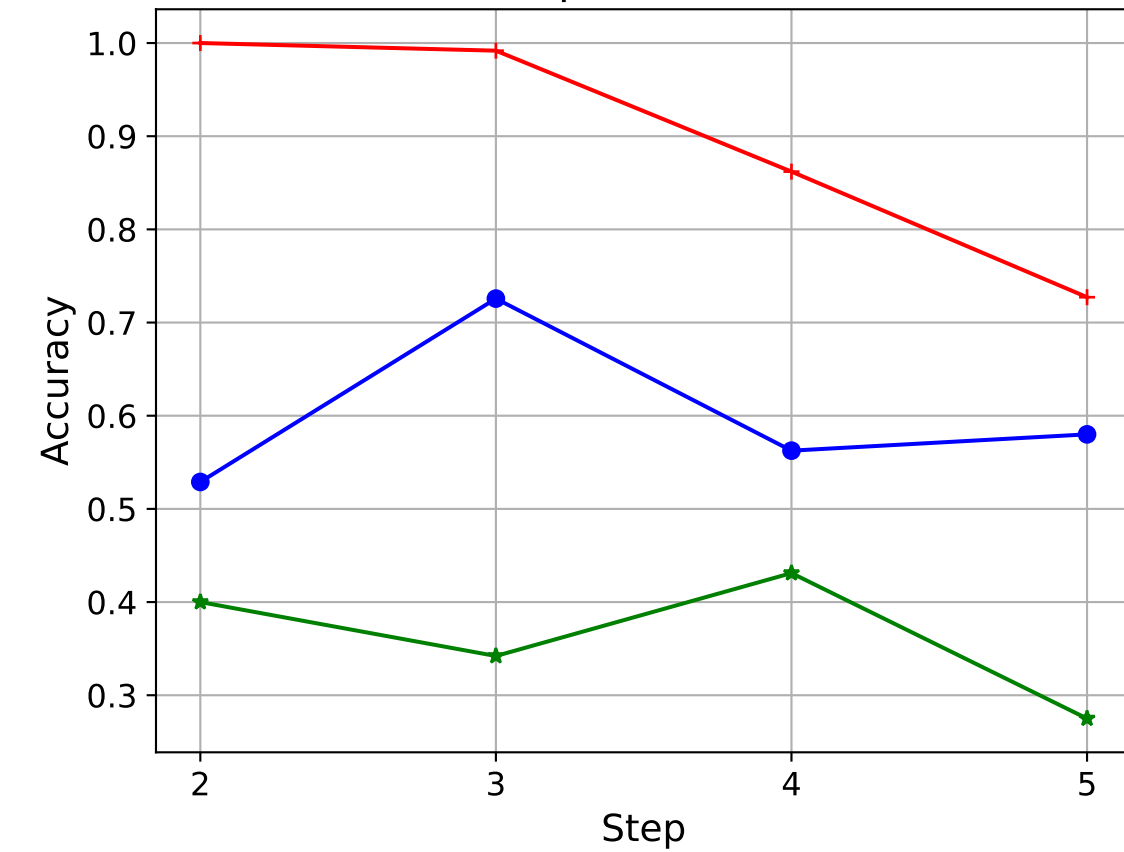

AQUA Step of Summarization

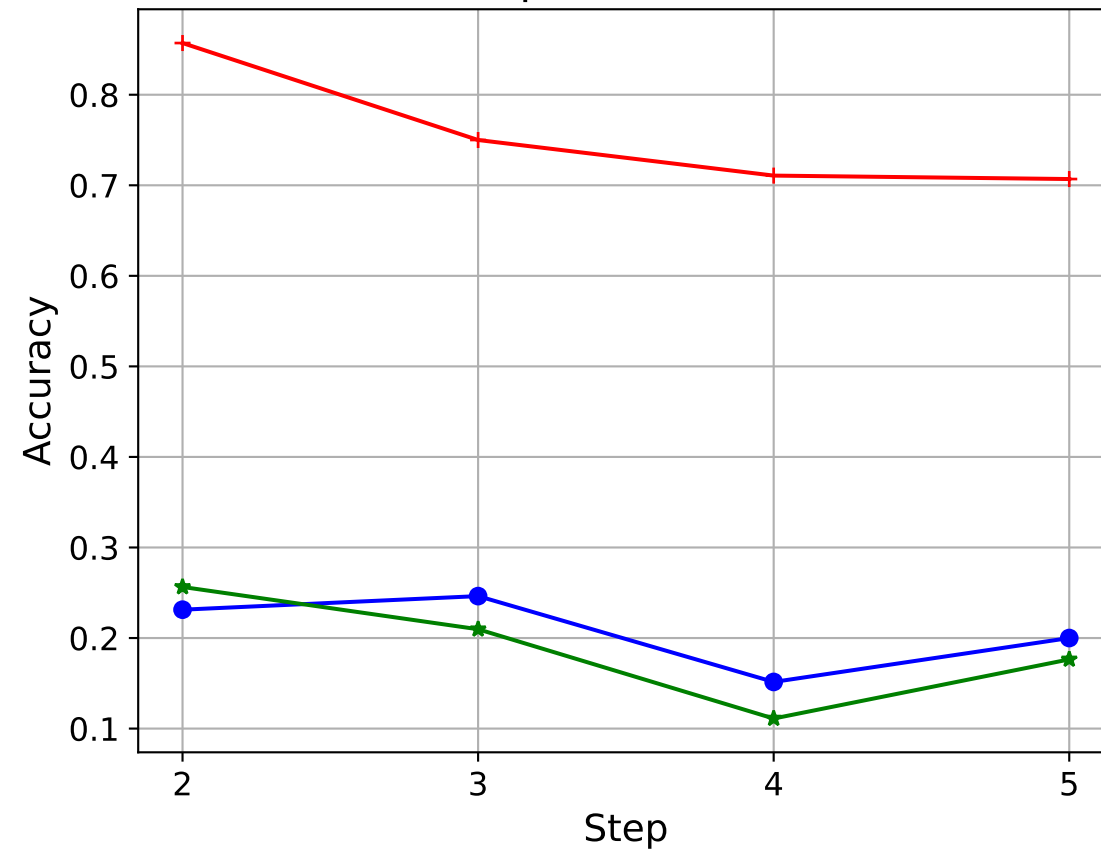

SVAMP Step of Summarization

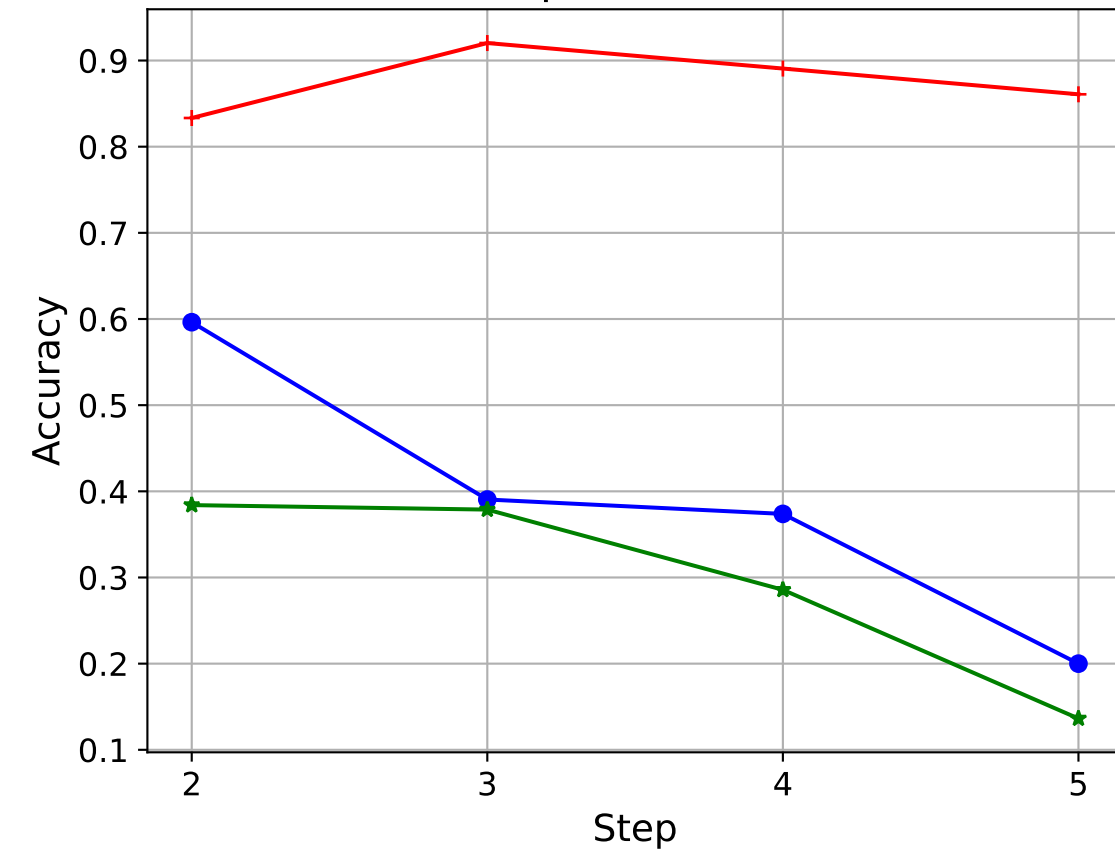

Supplement: supplementary_material [file all_datasets_step_summarization.pdf › arXiv-2501.04341v1/all_datasets_step_summarization.pdf]
