# Supplementary material
Source: ML conference proceedings conference paper supplement (https://openreview.net/forum?id=dPuAYNTNQ4)
Supplement: supplementary_material [file example.drawio.pdf › arXiv-2501.04341v1/example.drawio.pdf]

## Question

Q: A robe takes 2 bolts of blue fiber and half that much white fiber. How many bolts in total does it take?

## Information Pairs

White fiber

1. The amount of white fiber needed for the robe.
2. The robe requires half the amount of white fiber compared to blue fiber.
3. The robe requires 1 bolt of white fiber.

Blue fiber

1. The amount of blue fiber needed for the robe.
2. The robe requires 2 bolts of blue fiber.

Bolts

1. Units of measurement for the fiber required.
2. The quantity needed to create the robe.

Robe

1. The object being created or worked on.
2. Requires a specific amount of blue and white fiber.

## Final Information Pair

Total bolts

1. A robe requires 2 bolts of blue fiber and 1 bolt of white fiber.
2. The total bolts needed for the robe is the sum of blue and white fiber bolts.

## Context Input

Q: A robe takes 2 bolts of blue fiber and half that much white fiber. How many bolts in total does it take?

IP: Total bolts

1. A robe requires 2 bolts of blue fiber and 1 bolt of white fiber.
2. The total bolts needed for the robe is the sum of blue and white fiber bolts.

A: Let's think step by step.
