# Supplementary material
Source: ML conference proceedings conference paper supplement (https://openreview.net/forum?id=dPuAYNTNQ4)

(a) Adaptive Extraction of Candidate Information

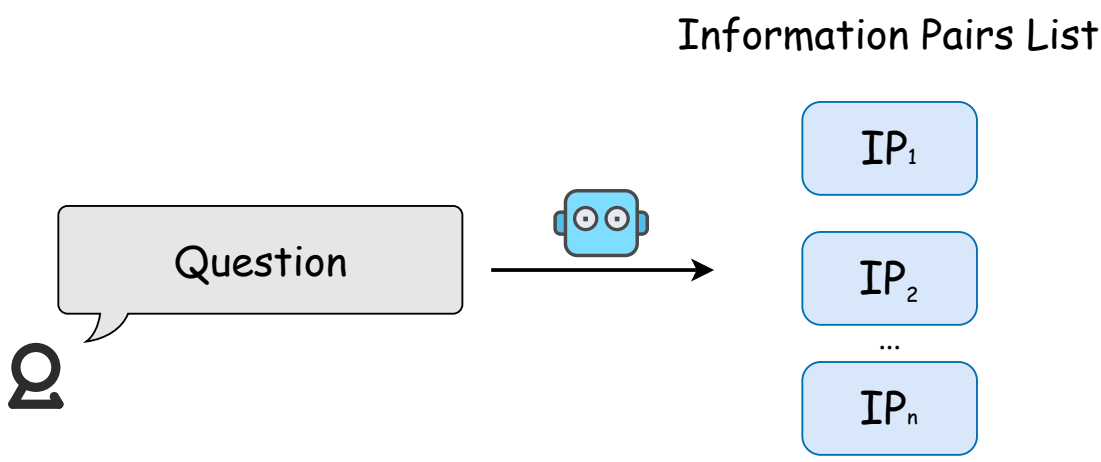

(b) Reliability Rating of Information Pairs

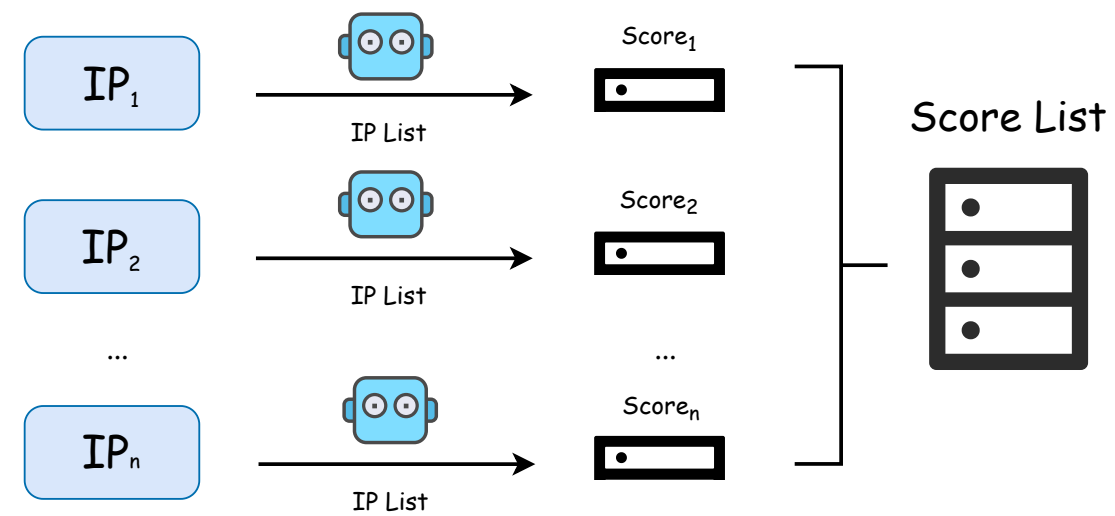

(c) Iterative Summarization for Knowledge Understanding

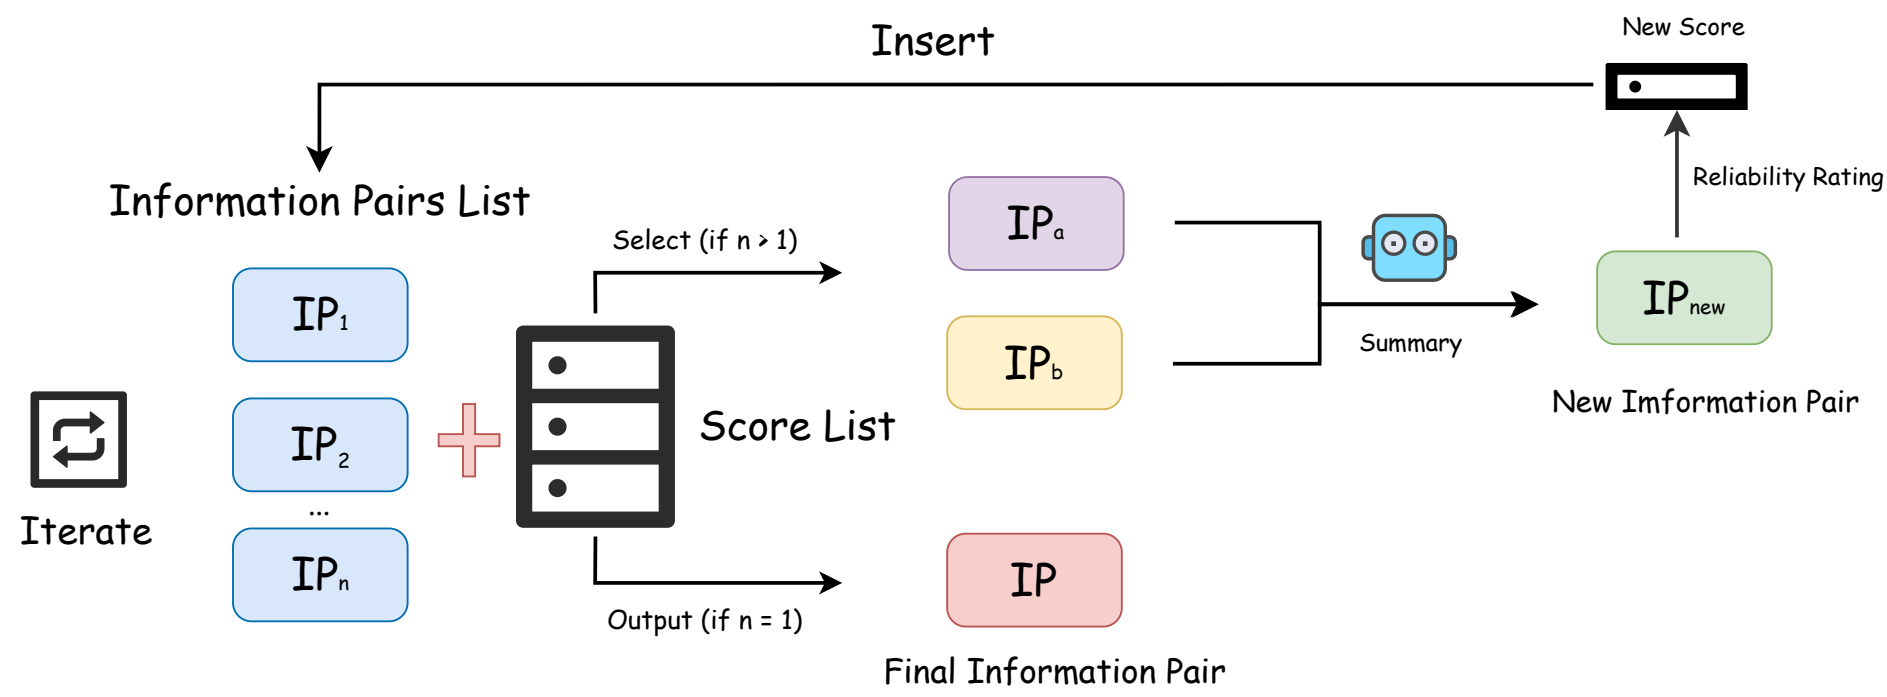

Supplement: supplementary_material [file ISP.drawio.pdf › arXiv-2501.04341v1/ISP.drawio.pdf]
