# Supplementary material
Source: ML conference proceedings conference paper supplement (https://openreview.net/forum?id=dPuAYNTNQ4)

(a) Dynamic Extraction

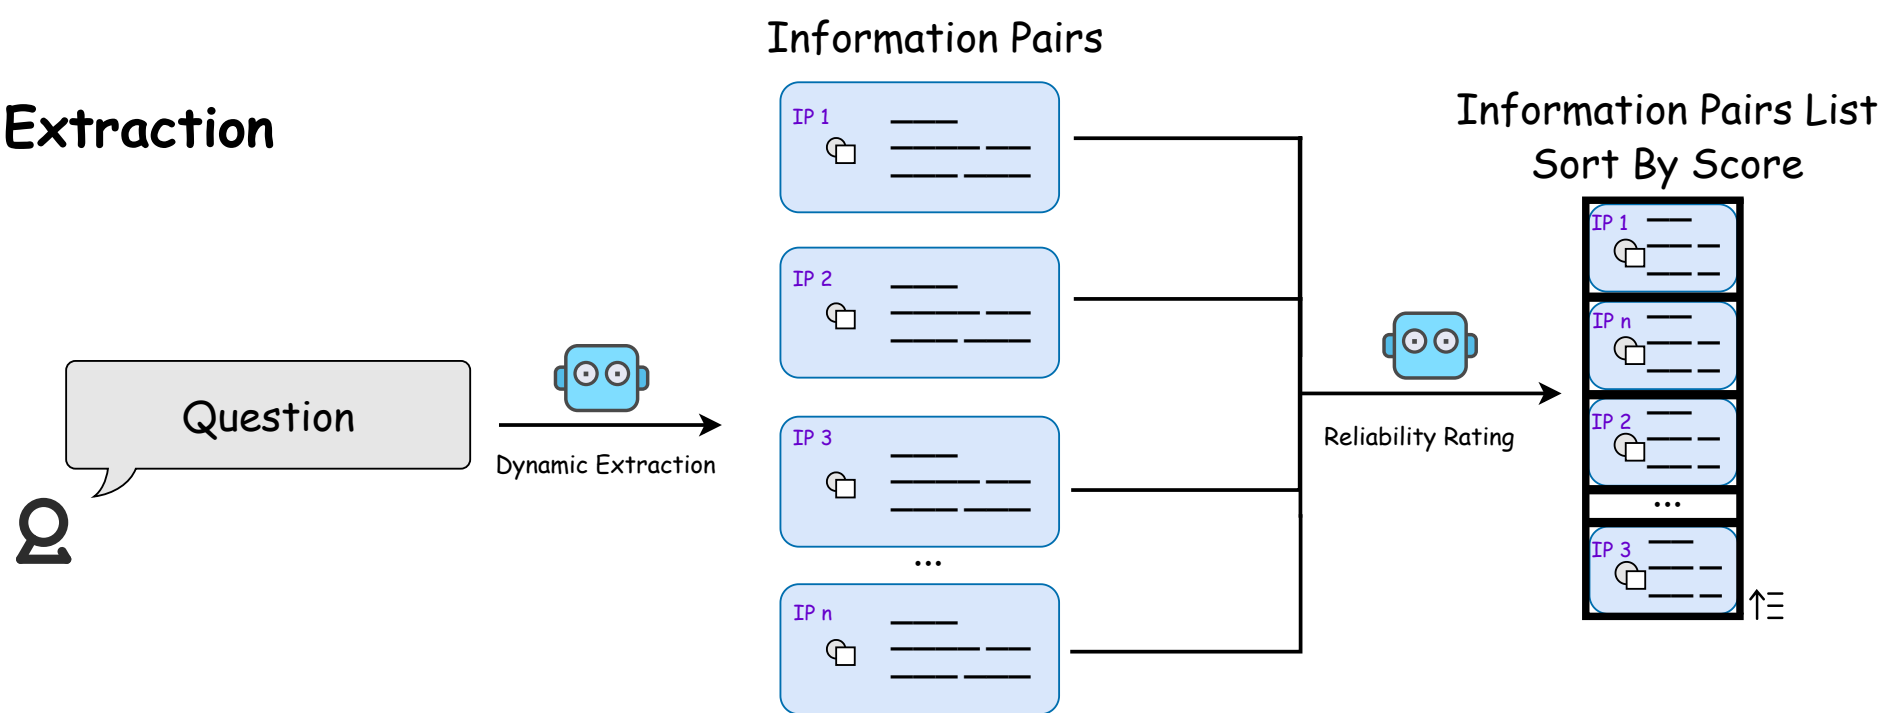

(b) Progressive Summarization

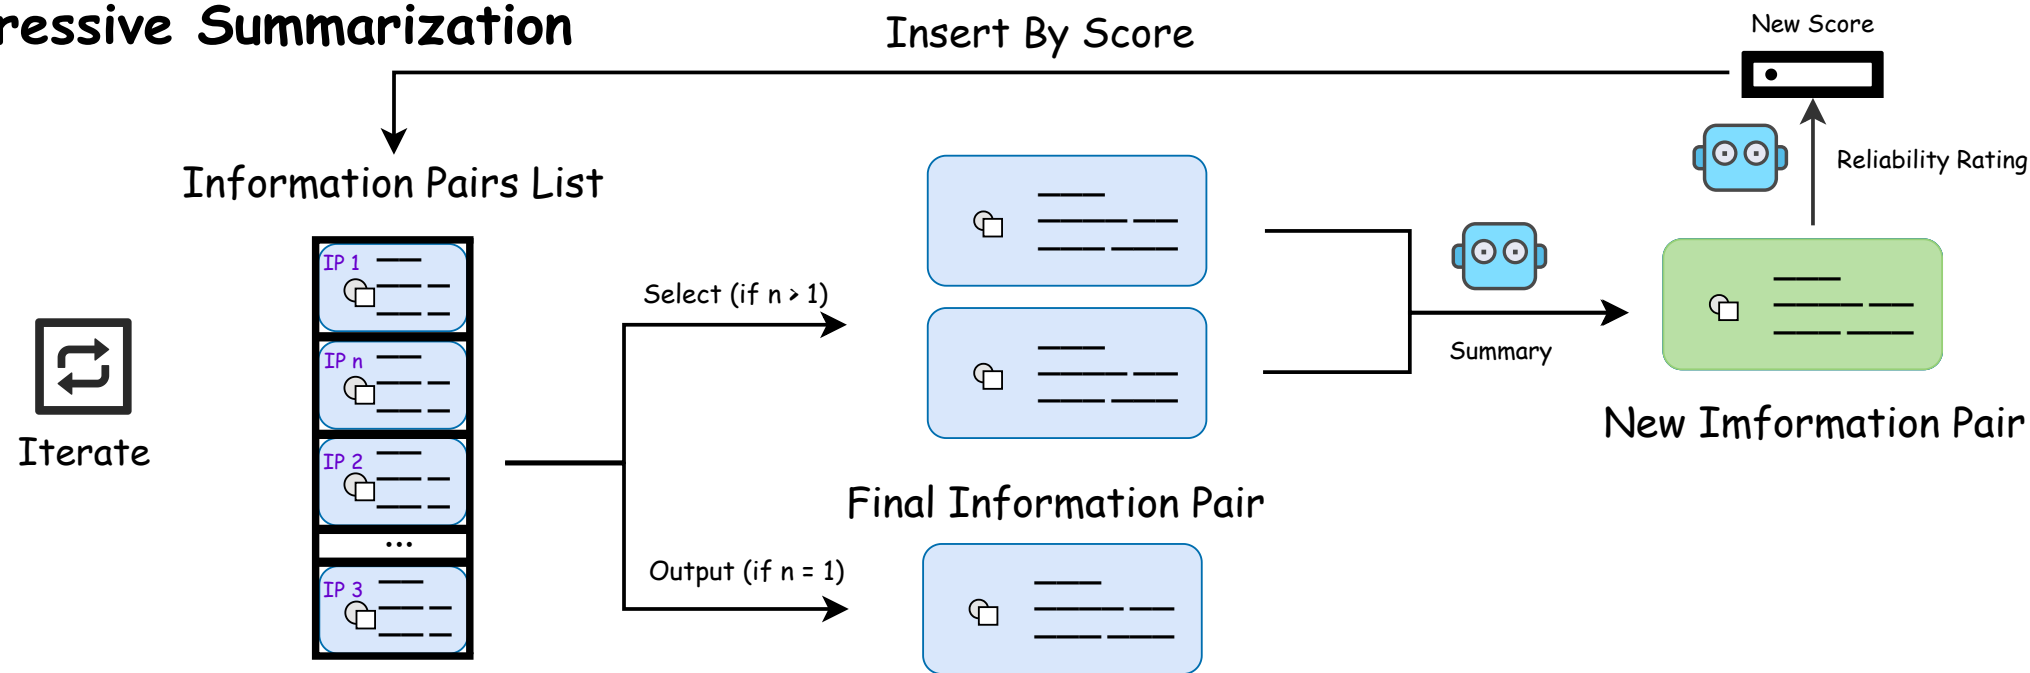

(c) Reasoning

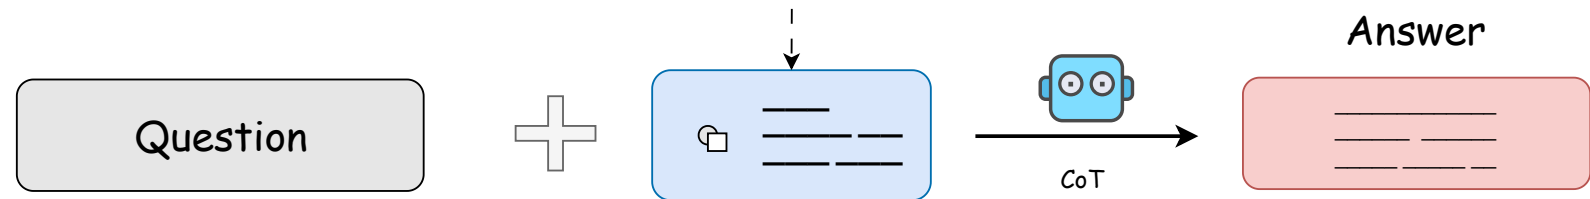

Supplement: supplementary_material [file DSR.drawio.pdf › arXiv-2501.04341v1/DSR.drawio.pdf]

—+— GPT-3.5 CoT    —●— LLaMA2-13B CoT    —▲— GPT-3.5 CoT    —■— LLaMA2-13B CoT

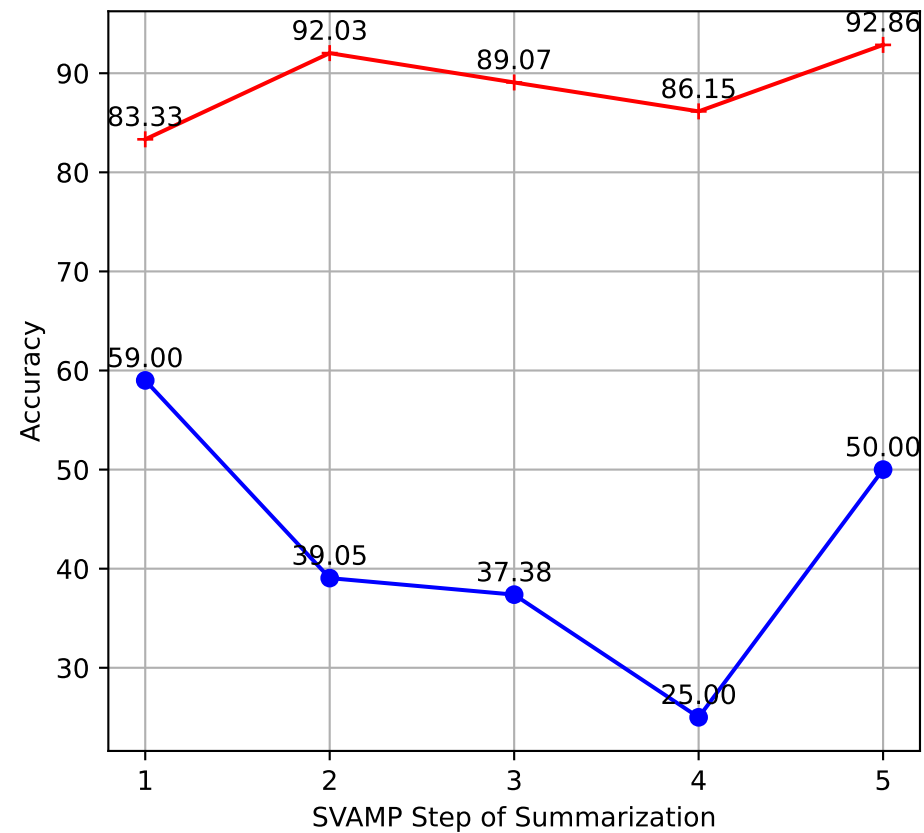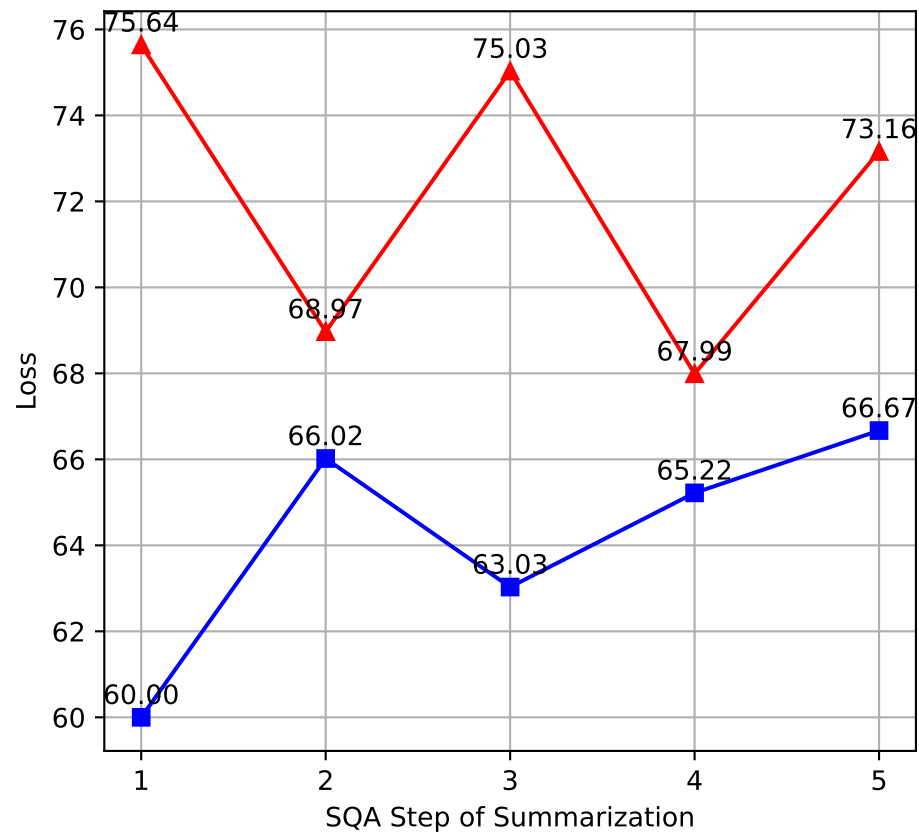

Supplement: supplementary_material [file comparison_table.pdf › arXiv-2501.04341v1/comparison_table.pdf]

(a) Dynamic Extraction

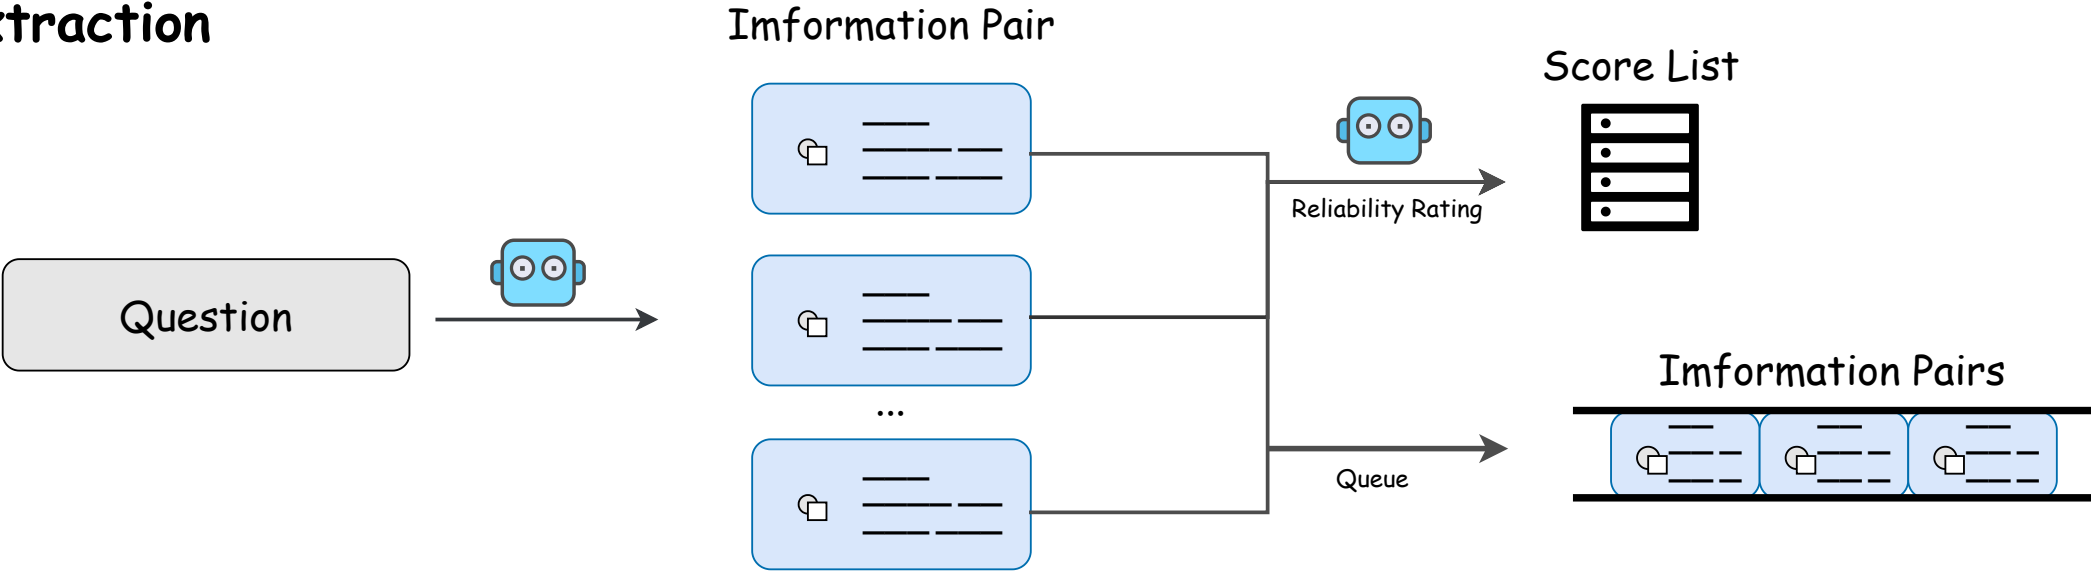

(b) Progressive Summarization

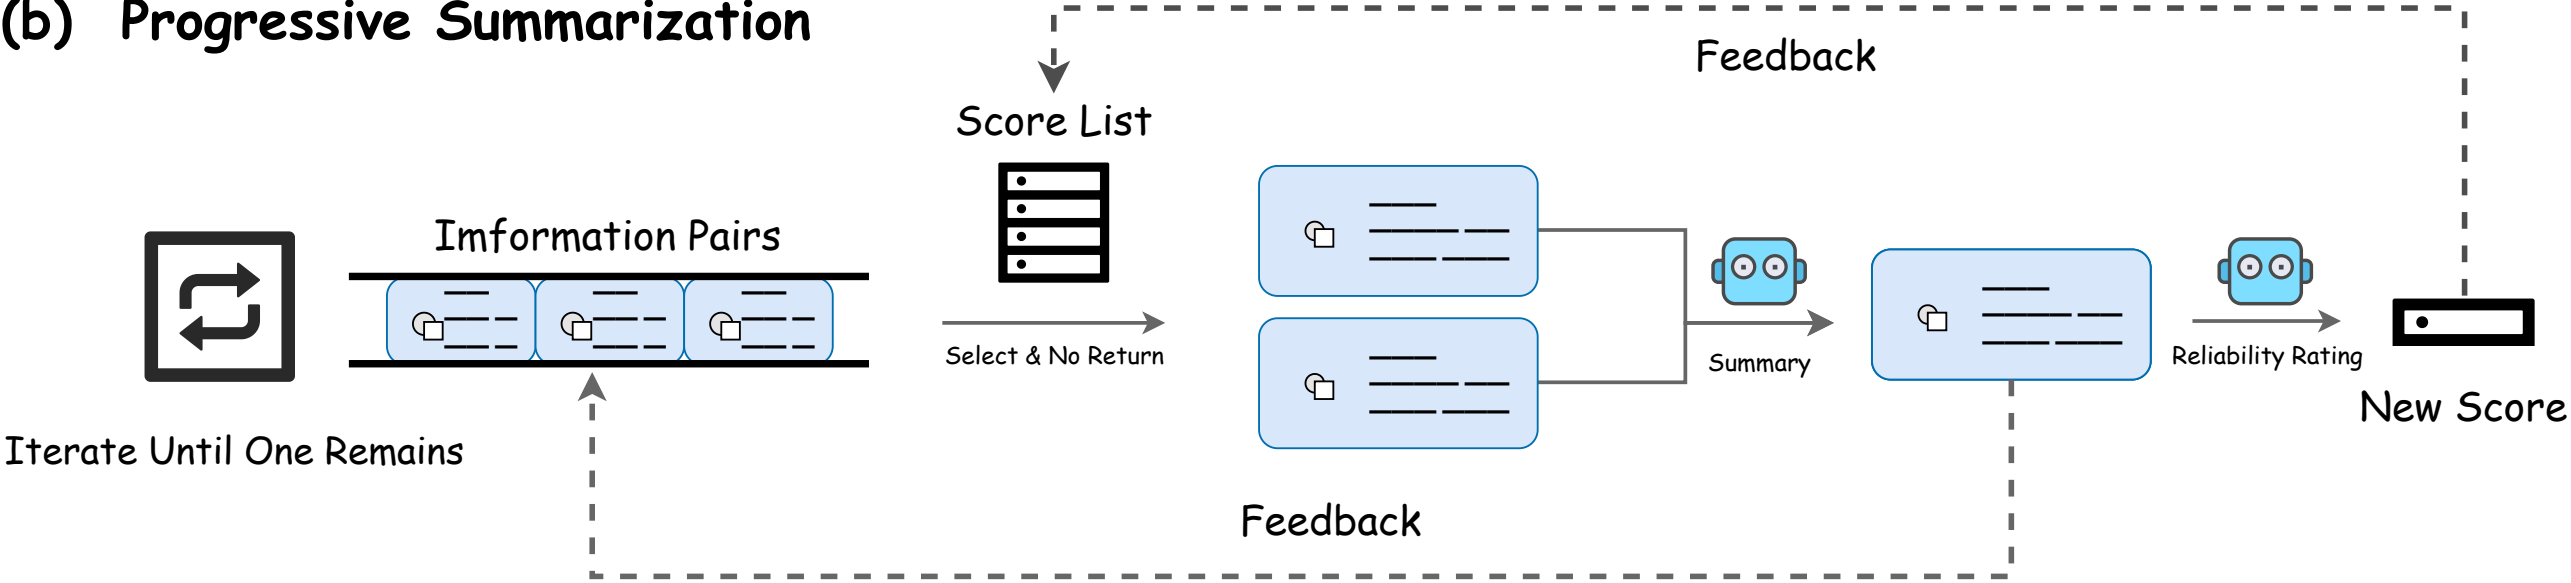

(c) Reasoning

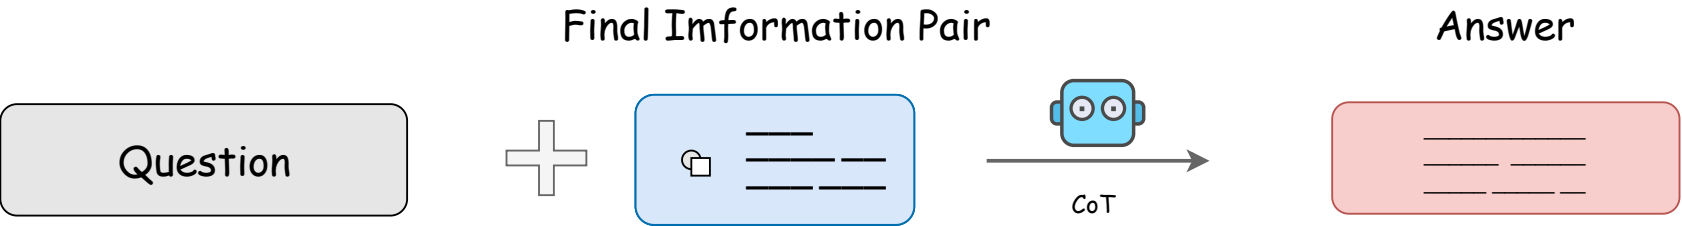

Supplement: supplementary_material [file newworkflow.drawio.pdf › arXiv-2501.04341v1/newworkflow.drawio.pdf]

(a) Prompting

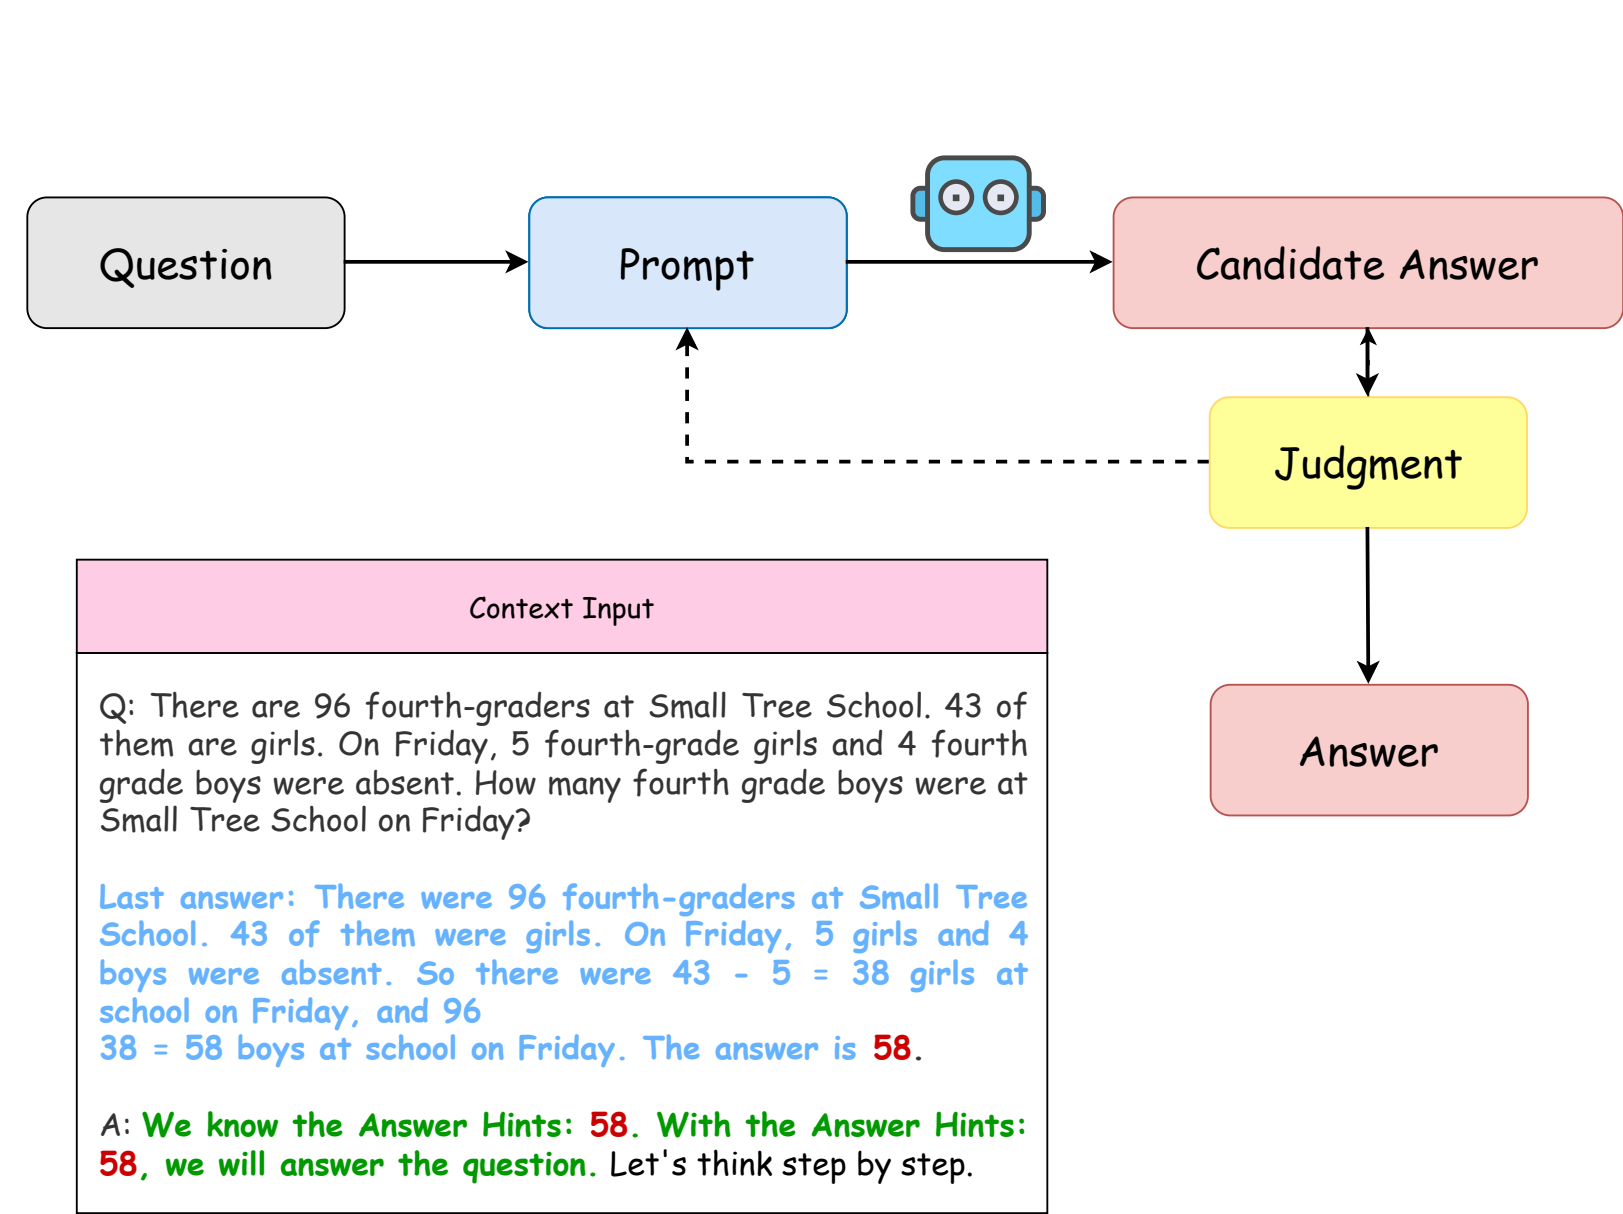

(b) Pre-Prompting

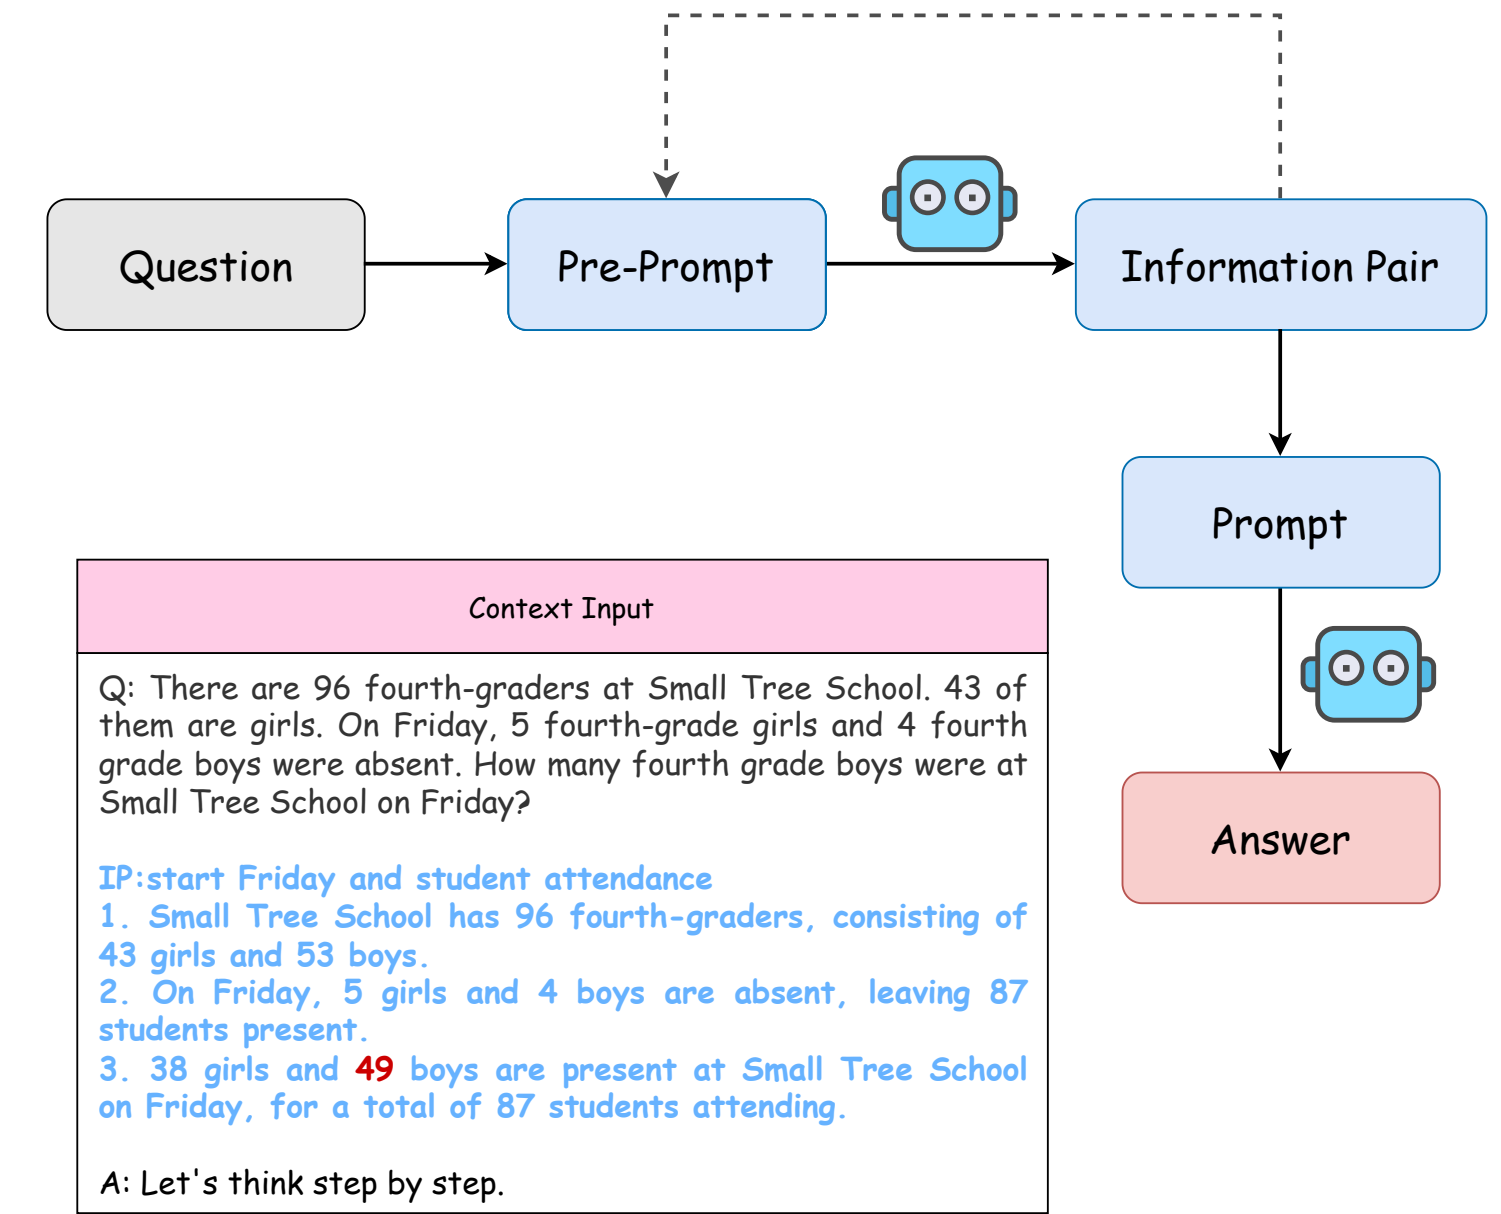

Supplement: supplementary_material [file preprompt.drawio.pdf › arXiv-2501.04341v1/preprompt.drawio.pdf]

(a) Dynamic Extraction

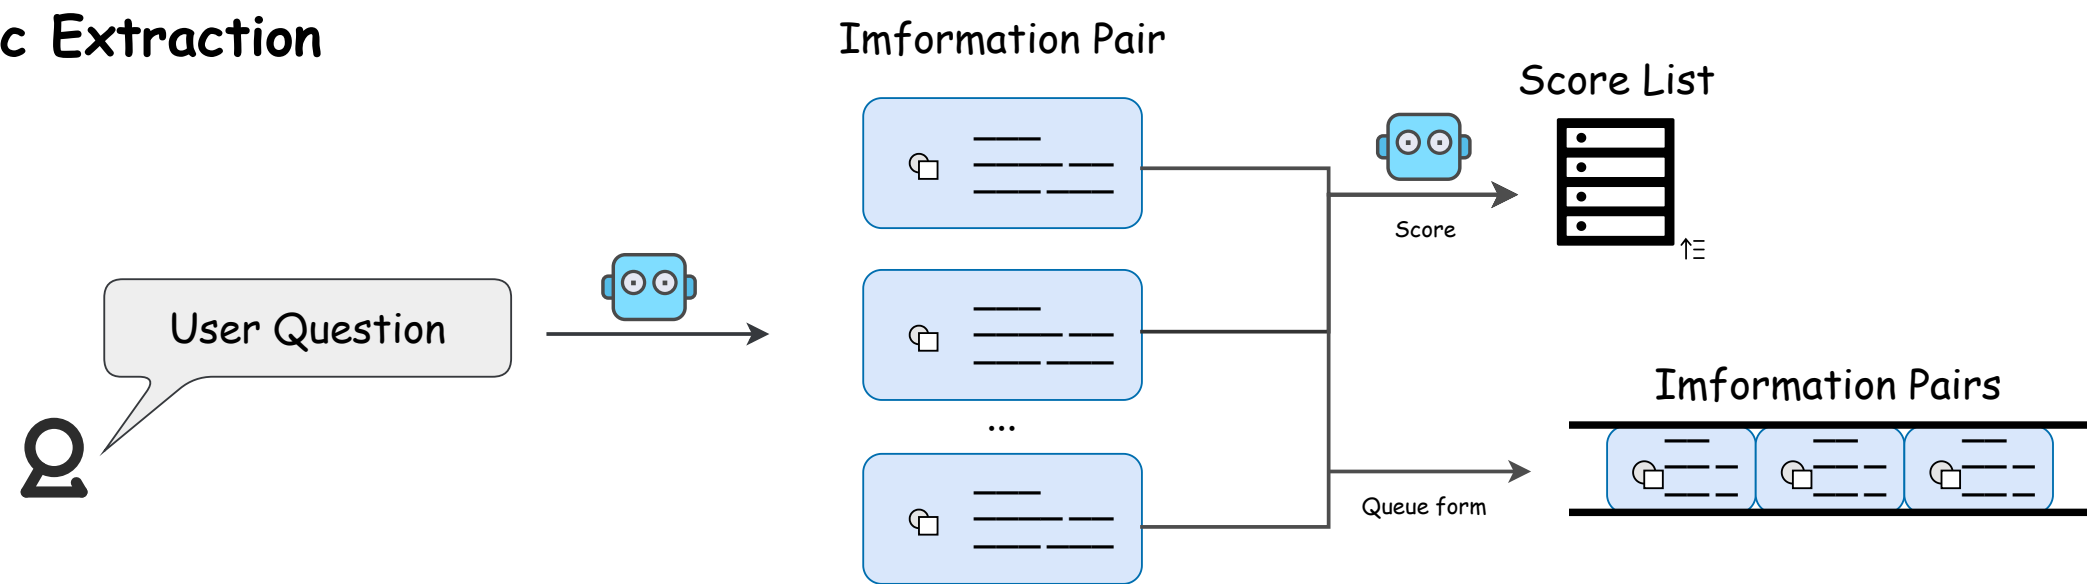

(b) Progressive Summarization

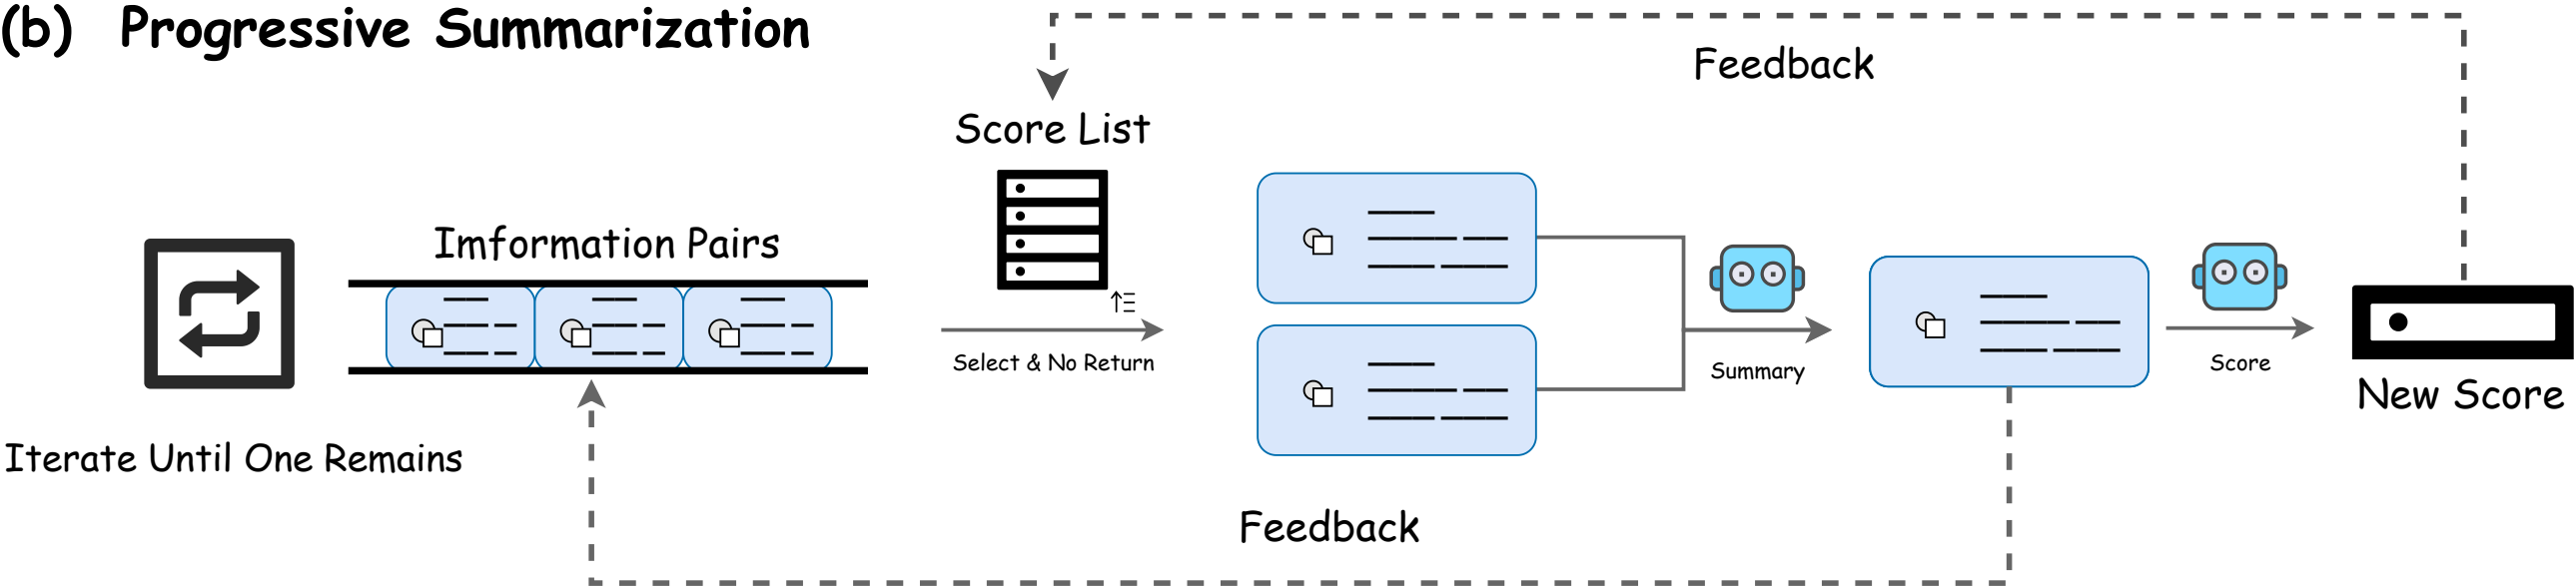

(c) Reasoning

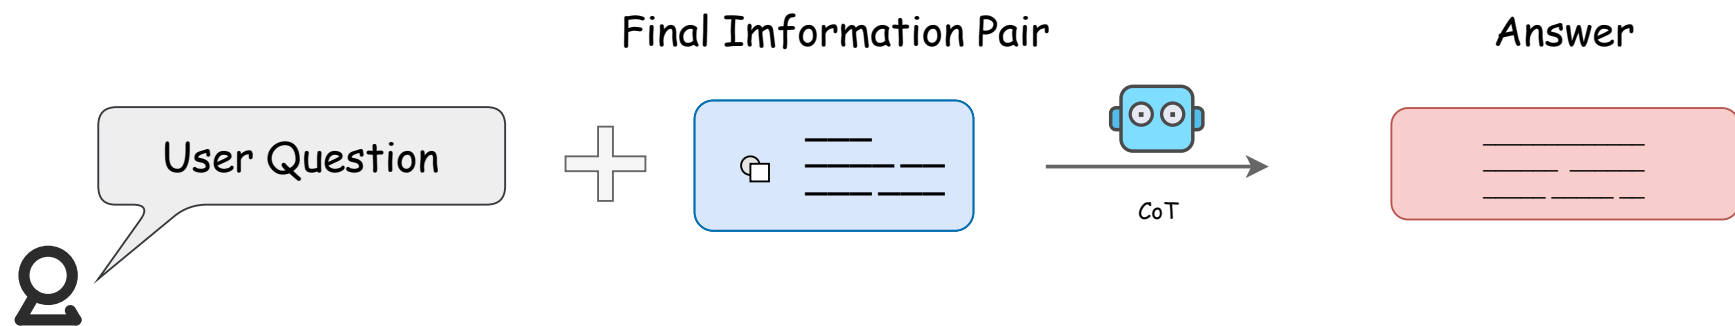

Supplement: supplementary_material [file workflow.drawio.pdf › arXiv-2501.04341v1/workflow.drawio.pdf]
